# Supplementary material
Source: MDPI journal article supplement (https://www.mdpi.com/1424-2818/7/4/385)
Supplement: s1 [file s1]

**Table S2.** List of variables used in the manuscript in cells of  $30' \times 30'$ . Original data are in cells of  $5' \times 5'$ , and the values used in the manuscript is the pooled mean all of the  $5' \times 5'$  cells within each  $30' \times 30'$  cell, with the exception of Rivers that is the sum of the area of all rivers within each  $30' \times 30'$  cell.

| Abbreviation | Variable                                                                                                                                                                                                                                    |
|--------------|---------------------------------------------------------------------------------------------------------------------------------------------------------------------------------------------------------------------------------------------|
| BIO1         | Annual Mean Temperature ( $^{\circ}\text{C}$ )                                                                                                                                                                                              |
| BIO2         | Mean Diurnal Range (Mean of monthly (max temp – min temp)) ( $^{\circ}\text{C}$ )                                                                                                                                                           |
| BIO3         | Isothermality ( $2/7$ ) ( $\times 100$ ) ( $^{\circ}\text{C}$ ). Ratio mean diurnal range/temperature annual range. It is an indicator of how large is the daily oscillation of temperature in comparison to temperature annual oscillation |
| BIO4         | Temperature Seasonality (standard deviation $\times 100$ )                                                                                                                                                                                  |
| BIO5         | Max Temperature of Warmest Month                                                                                                                                                                                                            |
| BIO6         | Min Temperature of Coldest Month ( $^{\circ}\text{C}$ )                                                                                                                                                                                     |
| BIO7         | Temperature Annual Range ( $5-6$ ) ( $^{\circ}\text{C}$ )                                                                                                                                                                                   |
| BIO8         | Mean Temperature of Wettest Quarter ( $^{\circ}\text{C}$ )                                                                                                                                                                                  |
| BIO9         | Mean Temperature of Driest Quarter ( $^{\circ}\text{C}$ )                                                                                                                                                                                   |
| BIO10        | Mean Temperature of Warmest Quarter ( $^{\circ}\text{C}$ )                                                                                                                                                                                  |
| BIO11        | Mean Temperature of Coldest Quarter ( $^{\circ}\text{C}$ )                                                                                                                                                                                  |
| BIO12        | Annual Precipitation (mm)                                                                                                                                                                                                                   |
| BIO13        | Precipitation of Wettest Month (mm)                                                                                                                                                                                                         |
| BIO14        | Precipitation of Driest Month (mm)                                                                                                                                                                                                          |
| BIO15        | Precipitation Seasonality (Coefficient of Variation)                                                                                                                                                                                        |
| BIO16        | Precipitation of Wettest Quarter (mm)                                                                                                                                                                                                       |
| BIO17        | Precipitation of Driest Quarter (mm)                                                                                                                                                                                                        |
| BIO18        | Precipitation of Warmest Quarter (mm)                                                                                                                                                                                                       |
| BIO19        | Precipitation of Coldest Quarter (mm)                                                                                                                                                                                                       |
| TPP          | Terrestrial primary production ( $\text{g C m}^{-2} \cdot \text{d}^{-1}$ )                                                                                                                                                                  |
| Pop          | Human population density (number of people per $\text{km}^2$ )                                                                                                                                                                              |
| TH24         | Topographic heterogeneity considering 24 surroundings cells                                                                                                                                                                                 |
| Altitude     | Altitude (meters)                                                                                                                                                                                                                           |
| Slope        | Topographic slope (degrees)                                                                                                                                                                                                                 |
| Rivers       | Area of the river basins ( $\text{km}^2$ )                                                                                                                                                                                                  |
| VI           | Vegetation index ( $\text{g C m}^2 \cdot \text{d}^{-1}$ )                                                                                                                                                                                   |
