# Supplementary material
Source: MDPI journal article supplement (https://www.mdpi.com/1424-2818/7/4/385)
Supplement: s1 [file s1]

**Table S1. List of species.**

| <b>Class</b> | <b>Order</b> | <b>Family</b> | <b>Genus</b>       | <b>Species</b>                  | <b>Number of Species</b> |
|--------------|--------------|---------------|--------------------|---------------------------------|--------------------------|
| Mammalia     |              |               |                    |                                 | 249                      |
|              | Carnivora    |               |                    |                                 | 249                      |
|              |              | Ailuridae     |                    |                                 | 1                        |
|              |              |               | <i>Ailurus</i>     |                                 | 1                        |
|              |              |               |                    | <i>Ailurus fulgens</i>          |                          |
|              |              | Canidae       |                    |                                 | 35                       |
|              |              |               | <i>Alopex</i>      |                                 | 1                        |
|              |              |               |                    | <i>Alopex lagopus</i>           |                          |
|              |              |               | <i>Atelocynus</i>  |                                 | 1                        |
|              |              |               |                    | <i>Atelocynus microtis</i>      |                          |
|              |              |               | <i>Canis</i>       |                                 | 7                        |
|              |              |               |                    | <i>Canis adustus</i>            |                          |
|              |              |               |                    | <i>Canis aureus</i>             |                          |
|              |              |               |                    | <i>Canis latrans</i>            |                          |
|              |              |               |                    | <i>Canis lupus</i>              |                          |
|              |              |               |                    | <i>Canis mesomelas</i>          |                          |
|              |              |               |                    | <i>Canis rufus</i>              |                          |
|              |              |               |                    | <i>Canis simensis</i>           |                          |
|              |              |               | <i>Cerdocyon</i>   |                                 | 1                        |
|              |              |               |                    | <i>Cerdocyon thous</i>          |                          |
|              |              |               | <i>Chrysocyon</i>  |                                 | 1                        |
|              |              |               |                    | <i>Chrysocyon brachyurus</i>    |                          |
|              |              |               | <i>Cuon</i>        |                                 | 1                        |
|              |              |               |                    | <i>Cuon alpinus</i>             |                          |
|              |              |               | <i>Lycalopex</i>   |                                 | 6                        |
|              |              |               |                    | <i>Lycalopex culpaeus</i>       |                          |
|              |              |               |                    | <i>Lycalopex fulvipes</i>       |                          |
|              |              |               |                    | <i>Lycalopex griseus</i>        |                          |
|              |              |               |                    | <i>Lycalopex gymnocercus</i>    |                          |
|              |              |               |                    | <i>Lycalopex sechurae</i>       |                          |
|              |              |               |                    | <i>Lycalopex vetulus</i>        |                          |
|              |              |               | <i>Lycaon</i>      |                                 | 1                        |
|              |              |               |                    | <i>Lycaon pictus</i>            |                          |
|              |              |               | <i>Nyctereutes</i> |                                 | 1                        |
|              |              |               |                    | <i>Nyctereutes procyonoides</i> |                          |
|              |              |               | <i>Otocyon</i>     |                                 | 1                        |
|              |              |               |                    | <i>Otocyon megalotis</i>        |                          |
|              |              |               | <i>Speothos</i>    |                                 | 1                        |
|              |              |               |                    | <i>Speothos venaticus</i>       |                          |
|              |              |               | <i>Urocyon</i>     |                                 | 2                        |
|              |              |               |                    | <i>Urocyon cinereoargenteus</i> |                          |
|              |              |               |                    | <i>Urocyon littoralis</i>       |                          |
|              |              |               | <i>Vulpes</i>      |                                 | 11                       |
|              |              |               |                    | <i>Vulpes bengalensis</i>       |                          |
|              |              |               |                    | <i>Vulpes cana</i>              |                          |
|              |              |               |                    | <i>Vulpes chama</i>             |                          |

Table S1. Cont.

| Class | Order | Family     | Genus               | Species                         | Number of Species |
|-------|-------|------------|---------------------|---------------------------------|-------------------|
|       |       |            |                     | <i>Vulpes corsac</i>            |                   |
|       |       |            |                     | <i>Vulpes ferrilata</i>         |                   |
|       |       |            |                     | <i>Vulpes macrotis</i>          |                   |
|       |       |            |                     | <i>Vulpes pallida</i>           |                   |
|       |       |            |                     | <i>Vulpes rueppellii</i>        |                   |
|       |       |            |                     | <i>Vulpes velox</i>             |                   |
|       |       |            |                     | <i>Vulpes vulpes</i>            |                   |
|       |       |            |                     | <i>Vulpes zerda</i>             |                   |
|       |       | Eupleridae |                     |                                 | 9                 |
|       |       |            | <i>Cryptoprocta</i> |                                 | 1                 |
|       |       |            |                     | <i>Cryptoprocta ferox</i>       |                   |
|       |       |            | <i>Eupleres</i>     |                                 | 1                 |
|       |       |            |                     | <i>Eupleres goudotii</i>        |                   |
|       |       |            | <i>Fossa</i>        |                                 | 1                 |
|       |       |            |                     | <i>Fossa fossana</i>            |                   |
|       |       |            | <i>Galidia</i>      |                                 | 1                 |
|       |       |            |                     | <i>Galidia elegans</i>          |                   |
|       |       |            | <i>Galidictis</i>   |                                 | 2                 |
|       |       |            |                     | <i>Galidictis fasciata</i>      |                   |
|       |       |            |                     | <i>Galidictis grandidieri</i>   |                   |
|       |       |            | <i>Mungotictis</i>  |                                 | 1                 |
|       |       |            |                     | <i>Mungotictis decemlineata</i> |                   |
|       |       |            | <i>Salanoia</i>     |                                 | 2                 |
|       |       |            |                     | <i>Salanoia concolor</i>        |                   |
|       |       |            |                     | <i>Salanoia durrelli</i>        |                   |
|       |       | Felidae    |                     |                                 | 40                |
|       |       |            | <i>Acinonyx</i>     |                                 | 1                 |
|       |       |            |                     | <i>Acinonyx jubatus</i>         |                   |
|       |       |            | <i>Caracal</i>      |                                 | 2                 |
|       |       |            |                     | <i>Caracal aurata</i>           |                   |
|       |       |            |                     | <i>Caracal caracal</i>          |                   |
|       |       |            | <i>Catopuma</i>     |                                 | 2                 |
|       |       |            |                     | <i>Catopuma badia</i>           |                   |
|       |       |            |                     | <i>Catopumatemminckii</i>       |                   |
|       |       |            | <i>Felis</i>        |                                 | 7                 |
|       |       |            |                     | <i>Felis bieti</i>              |                   |
|       |       |            |                     | <i>Felis catus</i>              |                   |
|       |       |            |                     | <i>Felis chaus</i>              |                   |
|       |       |            |                     | <i>Felis manul</i>              |                   |
|       |       |            |                     | <i>Felis margarita</i>          |                   |
|       |       |            |                     | <i>Felis nigripes</i>           |                   |
|       |       |            |                     | <i>Felis silvestris</i>         |                   |
|       |       |            | <i>Leopardus</i>    |                                 | 9                 |
|       |       |            |                     | <i>Leopardus braccatus</i>      |                   |
|       |       |            |                     | <i>Leopardus colocolo</i>       |                   |

Table S1. Cont.

| Class | Order | Family      | Genus               | Species                         | Number of Species |
|-------|-------|-------------|---------------------|---------------------------------|-------------------|
|       |       |             |                     | <i>Leopardus geoffroyi</i>      |                   |
|       |       |             |                     | <i>Leopardus guigna</i>         |                   |
|       |       |             |                     | <i>Leopardus jacobitus</i>      |                   |
|       |       |             |                     | <i>Leopardus pajeros</i>        |                   |
|       |       |             |                     | <i>Leopardus pardalis</i>       |                   |
|       |       |             |                     | <i>Leopardus tigrinus</i>       |                   |
|       |       |             |                     | <i>Leopardus wiedii</i>         |                   |
|       |       |             | <i>Leptailurus</i>  |                                 | 1                 |
|       |       |             |                     | <i>Leptailurus serval</i>       |                   |
|       |       |             | <i>Lynx</i>         |                                 | 4                 |
|       |       |             |                     | <i>Lynx canadensis</i>          |                   |
|       |       |             |                     | <i>Lynx lynx</i>                |                   |
|       |       |             |                     | <i>Lynx pardinus</i>            |                   |
|       |       |             |                     | <i>Lynx rufus</i>               |                   |
|       |       |             | <i>Neofelis</i>     |                                 | 2                 |
|       |       |             |                     | <i>Neofelis diardi</i>          |                   |
|       |       |             |                     | <i>Neofelis nebulosa</i>        |                   |
|       |       |             | <i>Panthera</i>     |                                 | 5                 |
|       |       |             |                     | <i>Panthera leo</i>             |                   |
|       |       |             |                     | <i>Panthera onca</i>            |                   |
|       |       |             |                     | <i>Panthera pardus</i>          |                   |
|       |       |             |                     | <i>Panthera tigris</i>          |                   |
|       |       |             |                     | <i>Panthera uncia</i>           |                   |
|       |       |             | <i>Pardofelis</i>   |                                 | 1                 |
|       |       |             |                     | <i>Pardofelis marmorata</i>     |                   |
|       |       |             | <i>Prionailurus</i> |                                 | 4                 |
|       |       |             |                     | <i>Prionailurus bengalensis</i> |                   |
|       |       |             |                     | <i>Prionailurus planiceps</i>   |                   |
|       |       |             |                     | <i>Prionailurus rubiginosus</i> |                   |
|       |       |             |                     | <i>Prionailurus viverrinus</i>  |                   |
|       |       |             | <i>Puma</i>         |                                 | 2                 |
|       |       |             |                     | <i>Puma concolor</i>            |                   |
|       |       |             |                     | <i>Puma yagouaroundi</i>        |                   |
|       |       | Herpestidae |                     |                                 | 34                |
|       |       |             | <i>Atilax</i>       |                                 | 1                 |
|       |       |             |                     | <i>Atilax paludinosus</i>       |                   |
|       |       |             | <i>Bdeogale</i>     |                                 | 4                 |
|       |       |             |                     | <i>Bdeogale crassicauda</i>     |                   |
|       |       |             |                     | <i>Bdeogale jacksoni</i>        |                   |
|       |       |             |                     | <i>Bdeogale nigripes</i>        |                   |
|       |       |             |                     | <i>Bdeogale omnivora</i>        |                   |
|       |       |             | <i>Crossarchus</i>  |                                 | 4                 |
|       |       |             |                     | <i>Crossarchus alexandri</i>    |                   |
|       |       |             |                     | <i>Crossarchus ansorgei</i>     |                   |
|       |       |             |                     | <i>Crossarchus obscurus</i>     |                   |

Table S1. Cont.

| Class | Order | Family    | Genus               | Species                          | Number of Species |
|-------|-------|-----------|---------------------|----------------------------------|-------------------|
|       |       |           |                     | <i>Crossarchus platycephalus</i> |                   |
|       |       |           | <i>Cynictis</i>     |                                  | 1                 |
|       |       |           |                     | <i>Cynictis penicillata</i>      |                   |
|       |       |           | <i>Dologale</i>     |                                  | 1                 |
|       |       |           |                     | <i>Dologale dybowski</i>         |                   |
|       |       |           | <i>Galerella</i>    |                                  | 4                 |
|       |       |           |                     | <i>Galerella flavescens</i>      |                   |
|       |       |           |                     | <i>Galerella ochracea</i>        |                   |
|       |       |           |                     | <i>Galerella pulverulenta</i>    |                   |
|       |       |           |                     | <i>Galerella sanguinea</i>       |                   |
|       |       |           | <i>Helogale</i>     |                                  | 2                 |
|       |       |           |                     | <i>Helogale hirtula</i>          |                   |
|       |       |           |                     | <i>Helogale parvula</i>          |                   |
|       |       |           | <i>Herpestes</i>    |                                  | 10                |
|       |       |           |                     | <i>Herpestes brachyurus</i>      |                   |
|       |       |           |                     | <i>Herpestes edwardsii</i>       |                   |
|       |       |           |                     | <i>Herpestes fuscus</i>          |                   |
|       |       |           |                     | <i>Herpestes ichneumon</i>       |                   |
|       |       |           |                     | <i>Herpestes javanicus</i>       |                   |
|       |       |           |                     | <i>Herpestes naso</i>            |                   |
|       |       |           |                     | <i>Herpestes semitorquatus</i>   |                   |
|       |       |           |                     | <i>Herpestes smithii</i>         |                   |
|       |       |           |                     | <i>Herpestes urva</i>            |                   |
|       |       |           |                     | <i>Herpestes vitticollis</i>     |                   |
|       |       |           | <i>Ichneumia</i>    |                                  | 1                 |
|       |       |           |                     | <i>Ichneumia albicauda</i>       |                   |
|       |       |           | <i>Liberiictis</i>  |                                  | 1                 |
|       |       |           |                     | <i>Liberiictis kuhni</i>         |                   |
|       |       |           | <i>Mungos</i>       |                                  | 2                 |
|       |       |           |                     | <i>Mungos gambianus</i>          |                   |
|       |       |           |                     | <i>Mungos mungo</i>              |                   |
|       |       |           | <i>Paracynictis</i> |                                  | 1                 |
|       |       |           |                     | <i>Paracynictis selousi</i>      |                   |
|       |       |           | <i>Rhynchogale</i>  |                                  | 1                 |
|       |       |           |                     | <i>Rhynchogale melleri</i>       |                   |
|       |       |           | <i>Suricata</i>     |                                  | 1                 |
|       |       |           |                     | <i>Suricata suricatta</i>        |                   |
|       |       | Hyaenidae |                     |                                  | 4                 |
|       |       |           | <i>Crocuta</i>      |                                  | 1                 |
|       |       |           |                     | <i>Crocuta crocuta</i>           |                   |
|       |       |           | <i>Hyaena</i>       |                                  | 2                 |
|       |       |           |                     | <i>Hyaena brunnea</i>            |                   |
|       |       |           |                     | <i>Hyaena hyaena</i>             |                   |
|       |       |           | <i>Proteles</i>     |                                  | 1                 |
|       |       |           |                     | <i>Proteles cristata</i>         |                   |

Table S1. Cont.

| Class | Order | Family     | Genus            | Species                        | Number of Species |
|-------|-------|------------|------------------|--------------------------------|-------------------|
|       |       | Mephitidae |                  |                                | 12                |
|       |       |            | <i>Conepatus</i> |                                | 4                 |
|       |       |            |                  | <i>Conepatus chinga</i>        |                   |
|       |       |            |                  | <i>Conepatus humboldtii</i>    |                   |
|       |       |            |                  | <i>Conepatus leuconotus</i>    |                   |
|       |       |            |                  | <i>Conepatus semistriatus</i>  |                   |
|       |       |            | <i>Mephitis</i>  |                                | 2                 |
|       |       |            |                  | <i>Mephitis macroura</i>       |                   |
|       |       |            |                  | <i>Mephitis mephitis</i>       |                   |
|       |       |            | <i>Mydaus</i>    |                                | 2                 |
|       |       |            |                  | <i>Mydaus javanensis</i>       |                   |
|       |       |            |                  | <i>Mydaus marchei</i>          |                   |
|       |       |            | <i>Spilogale</i> |                                | 4                 |
|       |       |            |                  | <i>Spilogale angustifrons</i>  |                   |
|       |       |            |                  | <i>Spilogale gracilis</i>      |                   |
|       |       |            |                  | <i>Spilogale putorius</i>      |                   |
|       |       |            |                  | <i>Spilogale pygmaea</i>       |                   |
|       |       | Mustelidae |                  |                                | 57                |
|       |       |            | <i>Aonyx</i>     |                                | 3                 |
|       |       |            |                  | <i>Aonyx capensis</i>          |                   |
|       |       |            |                  | <i>Aonyx cinerea</i>           |                   |
|       |       |            |                  | <i>Aonyx congicus</i>          |                   |
|       |       |            | <i>Arctonyx</i>  | <i>Arctonyx collaris</i>       | 1                 |
|       |       |            | <i>Eira</i>      |                                | 1                 |
|       |       |            |                  | <i>Eira barbara</i>            |                   |
|       |       |            | <i>Galictis</i>  |                                | 2                 |
|       |       |            |                  | <i>Galictis cuja</i>           |                   |
|       |       |            |                  | <i>Galictis vittata</i>        |                   |
|       |       |            | <i>Gulo</i>      |                                | 1                 |
|       |       |            |                  | <i>Gulo gulo</i>               |                   |
|       |       |            | <i>Hydrictis</i> |                                | 1                 |
|       |       |            |                  | <i>Hydrictis maculicollis</i>  |                   |
|       |       |            | <i>Ictonyx</i>   |                                | 2                 |
|       |       |            |                  | <i>Ictonyx libyca</i>          |                   |
|       |       |            |                  | <i>Ictonyx striatus</i>        |                   |
|       |       |            | <i>Lontra</i>    |                                | 4                 |
|       |       |            |                  | <i>Lontra canadensis</i>       |                   |
|       |       |            |                  | <i>Lontra felina</i>           |                   |
|       |       |            |                  | <i>Lontra longicaudis</i>      |                   |
|       |       |            |                  | <i>Lontra provocax</i>         |                   |
|       |       |            | <i>Lutra</i>     |                                | 2                 |
|       |       |            |                  | <i>Lutra lutra</i>             |                   |
|       |       |            |                  | <i>Lutra sumatrana</i>         |                   |
|       |       |            | <i>Lutrogale</i> |                                | 1                 |
|       |       |            |                  | <i>Lutrogale perspicillata</i> |                   |

Table S1. Cont.

| Class | Order | Family         | Genus              | Species                       | Number of Species |
|-------|-------|----------------|--------------------|-------------------------------|-------------------|
|       |       |                | <i>Lyncodon</i>    |                               | 1                 |
|       |       |                |                    | <i>Lyncodon patagonicus</i>   |                   |
|       |       |                | <i>Martes</i>      |                               | 8                 |
|       |       |                |                    | <i>Martes americana</i>       |                   |
|       |       |                |                    | <i>Martes flavigula</i>       |                   |
|       |       |                |                    | <i>Martes foina</i>           |                   |
|       |       |                |                    | <i>Martes gwatkinsii</i>      |                   |
|       |       |                |                    | <i>Martes martes</i>          |                   |
|       |       |                |                    | <i>Martes melampus</i>        |                   |
|       |       |                |                    | <i>Martes pennanti</i>        |                   |
|       |       |                |                    | <i>Martes zibellina</i>       |                   |
|       |       |                | <i>Meles</i>       |                               | 3                 |
|       |       |                |                    | <i>Meles anakuma</i>          |                   |
|       |       |                |                    | <i>Meles leucurus</i>         |                   |
|       |       |                |                    | <i>Meles meles</i>            |                   |
|       |       |                | <i>Mellivora</i>   |                               | 1                 |
|       |       |                |                    | <i>Mellivora capensis</i>     |                   |
|       |       |                | <i>Melogale</i>    |                               | 4                 |
|       |       |                |                    | <i>Melogale everetti</i>      |                   |
|       |       |                |                    | <i>Melogale moschata</i>      |                   |
|       |       |                |                    | <i>Melogale orientalis</i>    |                   |
|       |       |                |                    | <i>Melogale personata</i>     |                   |
|       |       |                | <i>Mustela</i>     |                               | 17                |
|       |       |                |                    | <i>Mustela africana</i>       |                   |
|       |       |                |                    | <i>Mustela altaica</i>        |                   |
|       |       |                |                    | <i>Mustela erminea</i>        |                   |
|       |       |                |                    | <i>Mustela eversmanii</i>     |                   |
|       |       |                | <i>Neovison</i>    |                               | 1                 |
|       |       |                |                    | <i>Neovison vison</i>         |                   |
|       |       |                | <i>Poecilogale</i> |                               | 1                 |
|       |       |                |                    | <i>Poecilogale albinucha</i>  |                   |
|       |       |                | <i>Pteronura</i>   |                               | 1                 |
|       |       |                |                    | <i>Pteronura brasiliensis</i> |                   |
|       |       |                | <i>Taxidea</i>     |                               | 1                 |
|       |       |                |                    | <i>Taxidea taxus</i>          |                   |
|       |       |                | <i>Vormela</i>     |                               | 1                 |
|       |       |                |                    | <i>Vormela peregusna</i>      |                   |
|       |       | Nandiniidae    | <i>I</i>           |                               |                   |
|       |       |                | <i>Nandinia</i>    |                               | 1                 |
|       |       |                |                    | <i>Nandinia binotata</i>      |                   |
|       |       | Prionodontidae |                    |                               | 2                 |
|       |       |                | <i>Prionodon</i>   |                               | 2                 |
|       |       |                |                    | <i>Prionodon linsang</i>      |                   |
|       |       |                |                    | <i>Prionodon pardicolor</i>   |                   |
|       |       | Procyonidae    |                    |                               | 14                |

Table S1. Cont.

| Class | Order | Family     | Genus               | Species                        | Number of Species |
|-------|-------|------------|---------------------|--------------------------------|-------------------|
|       |       |            | <i>Bassaricyon</i>  |                                | 5                 |
|       |       |            |                     | <i>Bassaricyon alleni</i>      |                   |
|       |       |            |                     | <i>Bassaricyon beddardi</i>    |                   |
|       |       |            |                     | <i>Bassaricyon gabbii</i>      |                   |
|       |       |            |                     | <i>Bassaricyon lasius</i>      |                   |
|       |       |            |                     | <i>Bassaricyon pauli</i>       |                   |
|       |       |            | <i>Bassariscus</i>  |                                | 2                 |
|       |       |            |                     | <i>Bassariscus astutus</i>     |                   |
|       |       |            |                     | <i>Bassariscus sumichrasti</i> |                   |
|       |       |            | <i>Nasua</i>        |                                | 2                 |
|       |       |            |                     | <i>Nasua narica</i>            |                   |
|       |       |            |                     | <i>Nasua nasua</i>             |                   |
|       |       |            | <i>Nasuella</i>     |                                | 1                 |
|       |       |            |                     | <i>Nasuella olivacea</i>       |                   |
|       |       |            | <i>Potos</i>        |                                | 1                 |
|       |       |            |                     | <i>Potos flavus</i>            |                   |
|       |       |            | <i>Procyon</i>      |                                | 3                 |
|       |       |            |                     | <i>Procyon cancrivorus</i>     |                   |
|       |       |            |                     | <i>Procyon lotor</i>           |                   |
|       |       |            |                     | <i>Procyon pygmaeus</i>        |                   |
|       |       | Ursidae    |                     |                                | 7                 |
|       |       |            | <i>Ailuropoda</i>   |                                | 1                 |
|       |       |            |                     | <i>Ailuropoda melanoleuca</i>  |                   |
|       |       |            | <i>Helarctos</i>    |                                | 1                 |
|       |       |            |                     | <i>Helarctos malayanus</i>     |                   |
|       |       |            | <i>Melursus</i>     |                                | 1                 |
|       |       |            |                     | <i>Melursus ursinus</i>        |                   |
|       |       |            | <i>Tremarctos</i>   |                                | 1                 |
|       |       |            |                     | <i>Tremarctos ornatus</i>      |                   |
|       |       |            | <i>Ursus</i>        |                                | 3                 |
|       |       |            |                     | <i>Ursus americanus</i>        |                   |
|       |       |            |                     | <i>Ursus arctos</i>            |                   |
|       |       |            |                     | <i>Ursus thibetanus</i>        |                   |
|       |       | Viverridae |                     |                                | 33                |
|       |       |            | <i>Arctictis</i>    |                                | 1                 |
|       |       |            |                     | <i>Arctictis binturong</i>     |                   |
|       |       |            | <i>Arctogalidia</i> |                                | 1                 |
|       |       |            |                     | <i>Arctogalidia trivirgata</i> |                   |
|       |       |            | <i>Chrotogale</i>   |                                | 1                 |
|       |       |            |                     | <i>Chrotogale owstoni</i>      |                   |
|       |       |            | <i>Civettictis</i>  |                                | 1                 |
|       |       |            |                     | <i>Civettictis civetta</i>     |                   |
|       |       |            | <i>Cynogale</i>     |                                | 1                 |
|       |       |            |                     | <i>Cynogale bennettii</i>      |                   |

Table S1. Cont.

| Class | Order | Family | Genus               | Species                             | Number of Species |
|-------|-------|--------|---------------------|-------------------------------------|-------------------|
|       |       |        | <i>Diplogale</i>    |                                     | 1                 |
|       |       |        |                     | <i>Diplogale hosei</i>              |                   |
|       |       |        | <i>Genetta</i>      |                                     | 14                |
|       |       |        |                     | <i>Genetta abyssinica</i>           |                   |
|       |       |        |                     | <i>Genetta angolensis</i>           |                   |
|       |       |        |                     | <i>Genetta burloni</i>              |                   |
|       |       |        |                     | <i>Genetta cristata</i>             |                   |
|       |       |        |                     | <i>Genetta genetta</i>              |                   |
|       |       |        |                     | <i>Genetta johnstoni</i>            |                   |
|       |       |        |                     | <i>Genetta maculata</i>             |                   |
|       |       |        |                     | <i>Genetta pardina</i>              |                   |
|       |       |        |                     | <i>Genetta piscivora</i>            |                   |
|       |       |        |                     | <i>Genetta poensis</i>              |                   |
|       |       |        |                     | <i>Genetta servalina</i>            |                   |
|       |       |        |                     | <i>Genetta thierryi</i>             |                   |
|       |       |        |                     | <i>Genetta tigrina</i>              |                   |
|       |       |        |                     | <i>Genetta victoriae</i>            |                   |
|       |       |        | <i>Hemigalus</i>    |                                     | 1                 |
|       |       |        |                     | <i>Hemigalus derbyanus</i>          |                   |
|       |       |        | <i>Macrogalidia</i> |                                     | 1                 |
|       |       |        |                     | <i>Macrogalidia musschenbroekii</i> |                   |
|       |       |        | <i>Paguma</i>       |                                     | 1                 |
|       |       |        |                     | <i>Paguma larvata</i>               |                   |
|       |       |        | <i>Paradoxurus</i>  |                                     | 3                 |
|       |       |        |                     | <i>Paradoxurus hermaphroditus</i>   |                   |
|       |       |        |                     | <i>Paradoxurus jerdoni</i>          |                   |
|       |       |        |                     | <i>Paradoxurus zeylonensis</i>      |                   |
|       |       |        | <i>Poiana</i>       |                                     | 2                 |
|       |       |        |                     | <i>Poiana leightoni</i>             |                   |
|       |       |        |                     | <i>Poiana richardsonii</i>          |                   |
|       |       |        | <i>Viverra</i>      |                                     | 4                 |
|       |       |        |                     | <i>Viverra civettina</i>            |                   |
|       |       |        |                     | <i>Viverra megaspila</i>            |                   |
|       |       |        |                     | <i>Viverra tangalunga</i>           |                   |
|       |       |        |                     | <i>Viverra zibetha</i>              |                   |
|       |       |        | <i>Viverricula</i>  |                                     | 1                 |
|       |       |        |                     | <i>Viverricula indica</i>           |                   |
